# Supplementary material
Source: PubMed Central journal article supplement (PMC3608687)
Supplement: NIHMS451000-supplement-Suppl__data.pdf [file NIHMS451000-supplement-Suppl__data.pdf]

Supplemental Figure S1

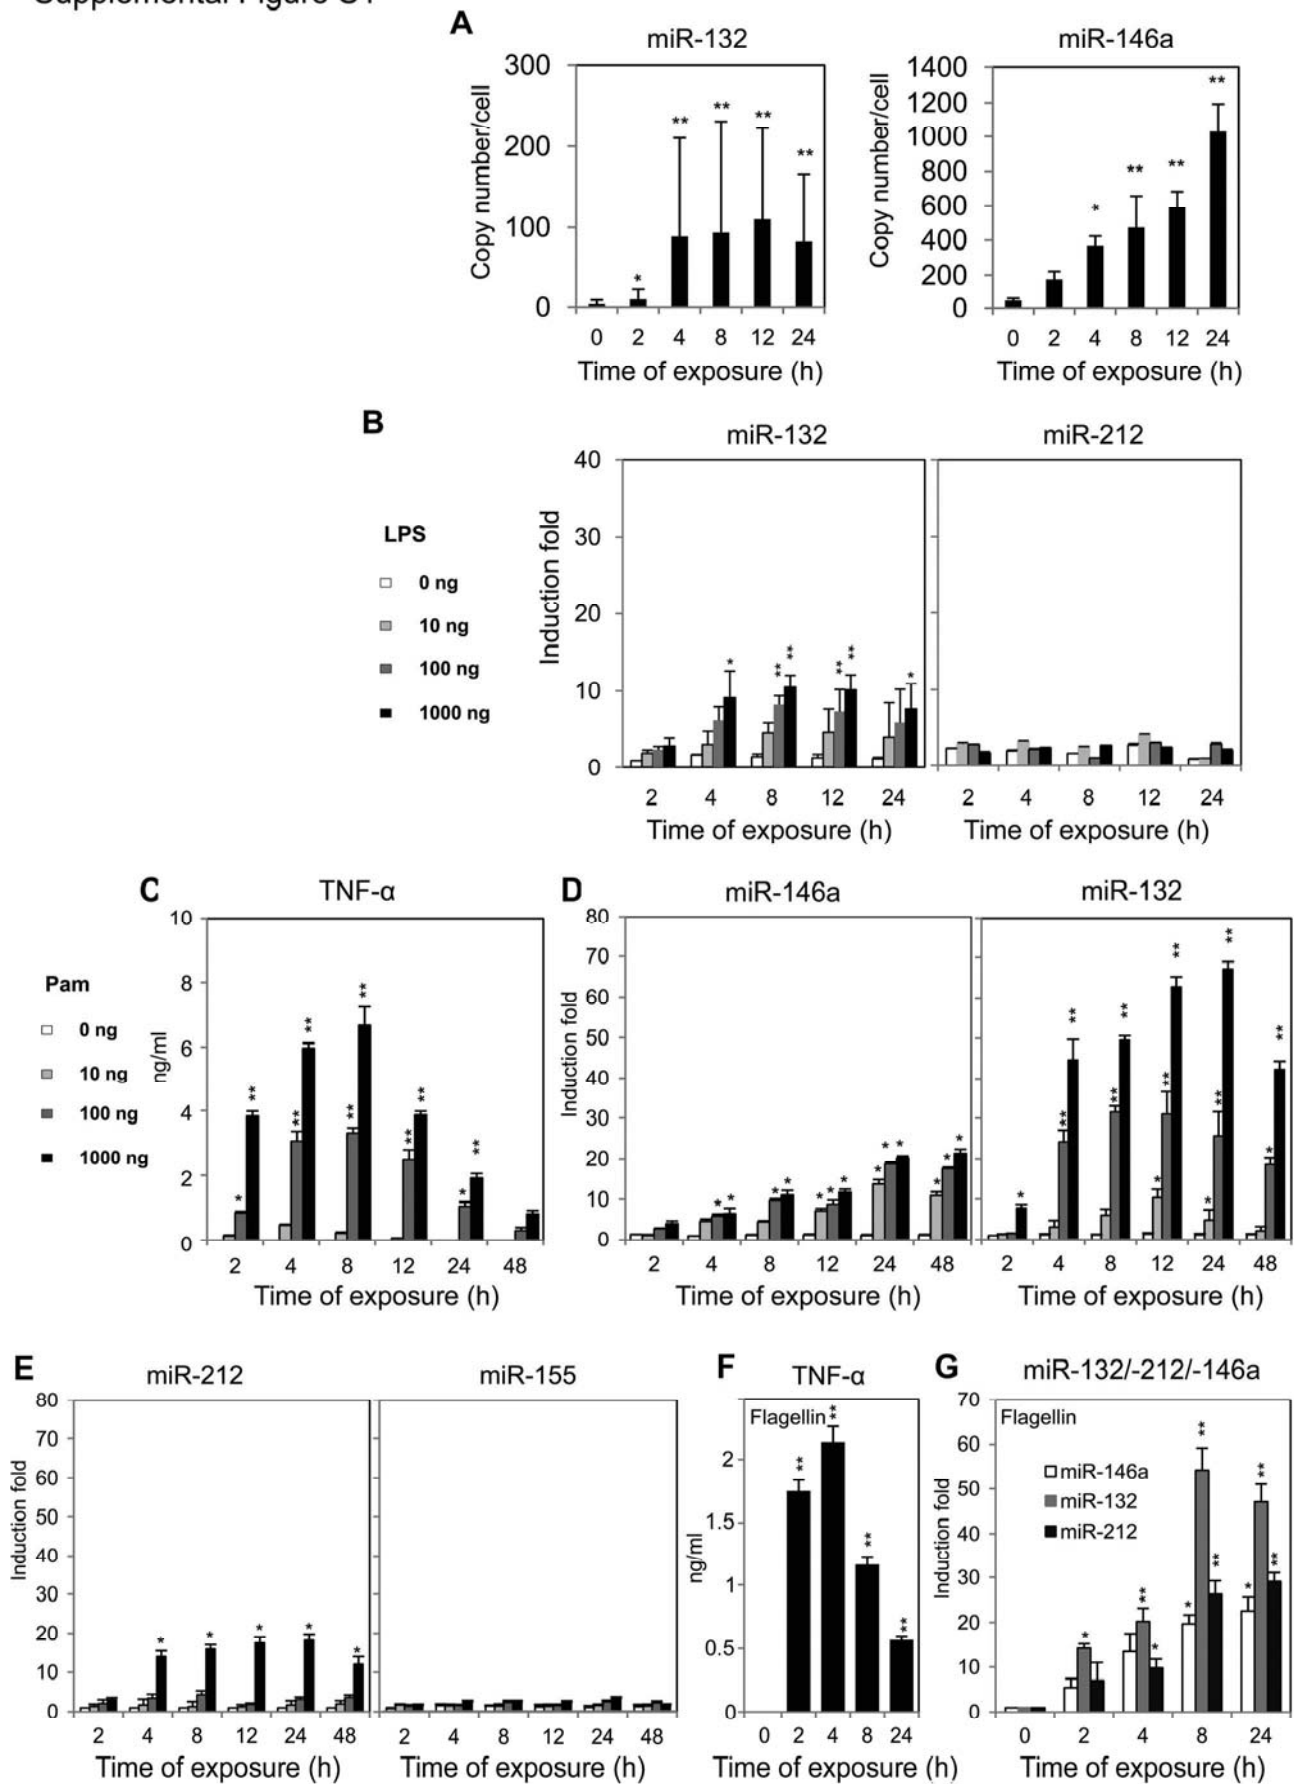

**Supplementary Figure S1. Supplemental data on the characterization of miRNA expression and TNF- $\alpha$  production during TLR-ligand stimulation of THP1 monocytes.** (A) Time-course analysis of copy number of miR-132 and miR-146a in PGN-stimulated THP-1 monocytes. Copy number of miR-132 and miR-146a in THP-1 cells stimulated for 0-24 h (horizontal axis) with PGN (2500 ng/ml). (B) Induction of miR-132 and miR-212 by LPS treatment in THP-1 monocytes. qRT-PCR analysis of dose- and time-dependent expression of miR-132 and miR-212 in THP-1 monocytes stimulated for 2-24 h with 0-1000 ng/ml LPS. (C) TNF- $\alpha$  production by THP-1 cells stimulated with Pam. THP-1 monocytes were incubated for 2-48 h with 0-1000 ng/ml Pam and TNF- $\alpha$  in culture supernatant was measured by ELISA. (D-E) qRT-PCR analysis of miR-146a, miR-132, miR-212, and miR-155 expression kinetics in Pam-treated THP-1 cell. (F) TNF- $\alpha$  production by THP-1 monocytes stimulated for 0-24 h with 300 ng/ml flagellin. (G) qRT-PCR analysis of miR-146a, miR-132, and miR-212 expression in the same THP-1 cells stimulated with 300 ng/ml flagellin. All miRNA expressions were normalized to RNU44. Data are from three independent experiments (mean  $\pm$  s.d.). \* $P$  < 0.05; \*\* $P$  < 0.01 (two-tailed unpaired  $t$ -test) compared with time 0 controls (A,F-G) or untreated controls (B-D).

Supplemental Figure S2

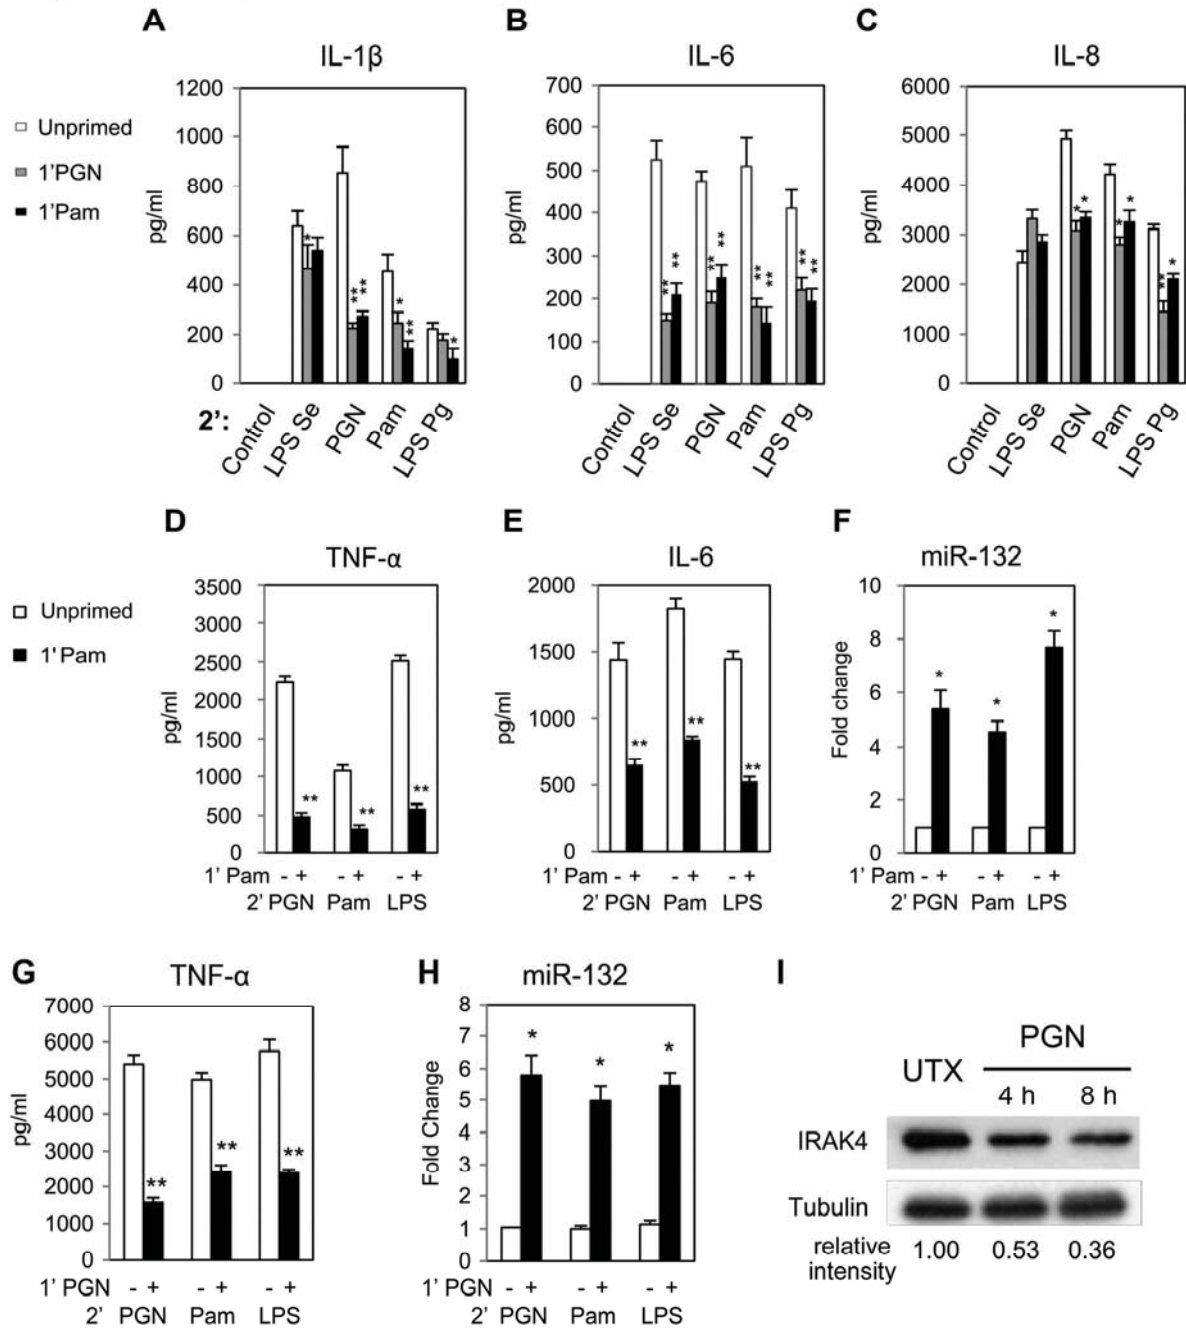

**Supplementary Figure S2. Supplemental data on cytokine production in THP-1 cells, human PBMCs, and mouse RAW264.7 cells primed with PGN or Pam and challenged by other TLR-ligands.** (A-C) Diminished proinflammatory cytokine secretions by PGN- and Pam-primed THP-1 monocytes. ELISA of IL-1 $\beta$  (A), IL-6 (B), and IL-8 (C) production by THP-1 monocytes primed with or without PGN or Pam (500 ng/ml) for 18 h and then challenged with various ligands (horizontal axis) for 3 h (IL-1 $\beta$ ) or 24 h (IL-6 and IL-8). (D-F) High levels of miR-132 may account for Pam-induced tolerance in human PBMCs. TNF- $\alpha$  (D) and IL-6 (E) production by human PBMCs primed with or without Pam (1000 ng/ml) for 18 h and then challenged with various ligands (horizontal axis) for 3 h (TNF- $\alpha$ ) or 24 h (IL-6). (F) qRT-PCR analysis of miR-132 in the PBMC treated as in D. (G-I) High levels of miR-132 may promote PGN-induced tolerance in mouse RAW264.7 cells. (G) TNF- $\alpha$  production by RAW264.7 cells primed with or without PGN (1000 ng/ml) for 18 h and then challenged with various ligands (horizontal axis) for 3 h. (H) qRT-PCR analysis of miR-132 in the purified total RNA obtained from cells described in G. (I) Immunoblot analysis of IRAK4 in RAW264.7 cells stimulated for 4 and 8 h with PGN (2000 ng/ml). Tubulin serves as a loading control. Data and error bars (mean  $\pm$  s.d.) are from either from two (A-C and G-H) or three (D-F) independent experiments. \* $P$  < 0.05; \*\* $P$  < 0.01 (two-tailed unpaired  $t$ -test) compared with unprimed control.

Supplemental Figure S3

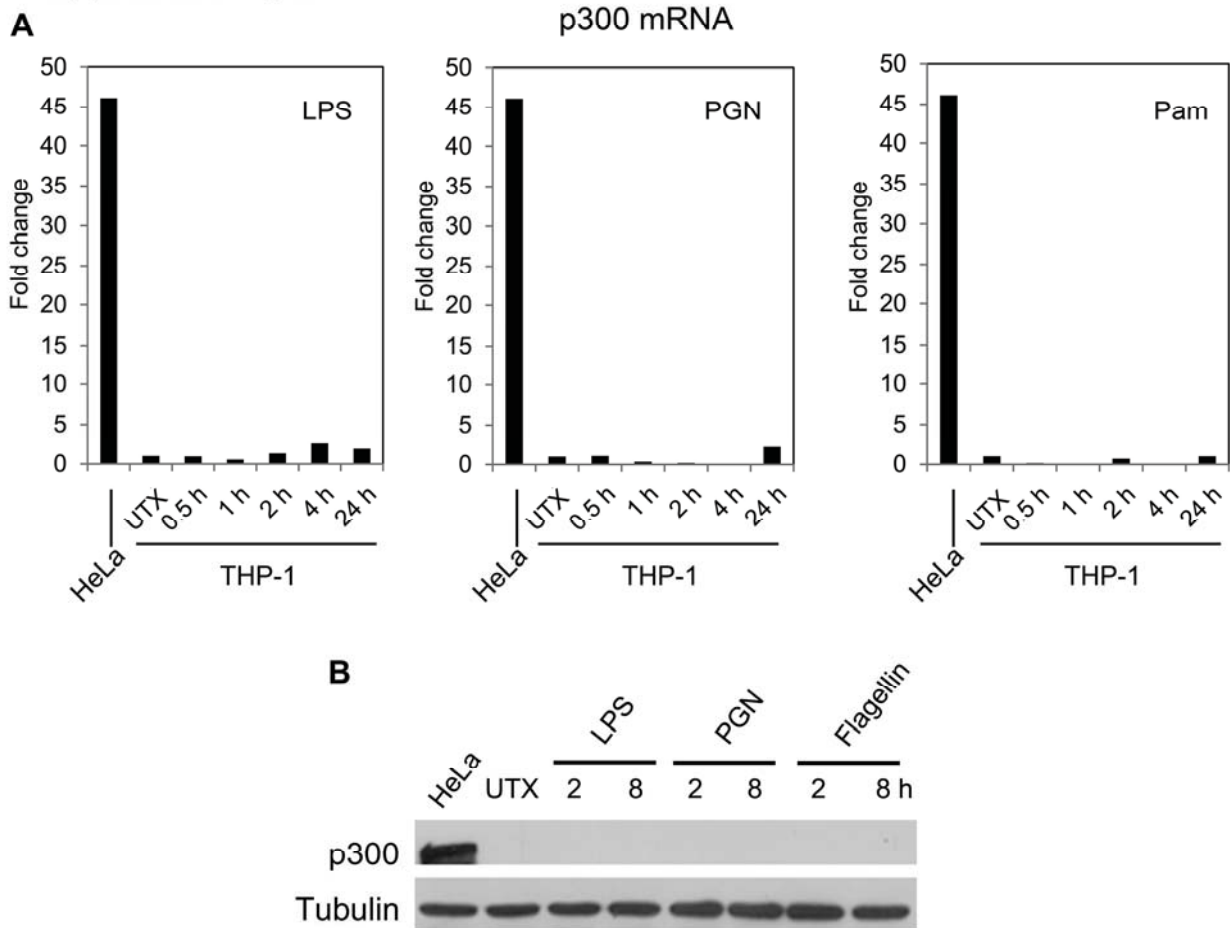

**Supplementary Figure S3. p300 expression in THP-1 cells stimulated by LPS, PGN, Pam, and flagellin.** (A) Little or no expression of p300 mRNA detected in THP-1 cells untreated (UTX) or treated with 1  $\mu\text{g/ml}$  of LPS, PGN, or Pam for different time points as indicated up to 24 h. Positive control RNA from HeLa cells was included for the qRT-PCR analysis. (B) Immunoblot analysis of p300 in THP-1 cells stimulated for 2 or 8 h with 1  $\mu\text{g/ml}$  of LPS, PGN, or flagellin. Cell lysate from HeLa cells was included as a positive control and tubulin analyzed as a loading control.
